# Supplementary material for: Mitochondrial cytochrome c oxidase subunit I (COI) metabarcoding of Foraminifera communities using taxon-specific primers
Source: PeerJ journal article supplement (doi:10.7717/peerj.13952), 2022-09-05
Supplement: Supplementary_Figure_1_Cladogram_.pdf [file Supplementary_Figure_1_Cladogram_.pdf]

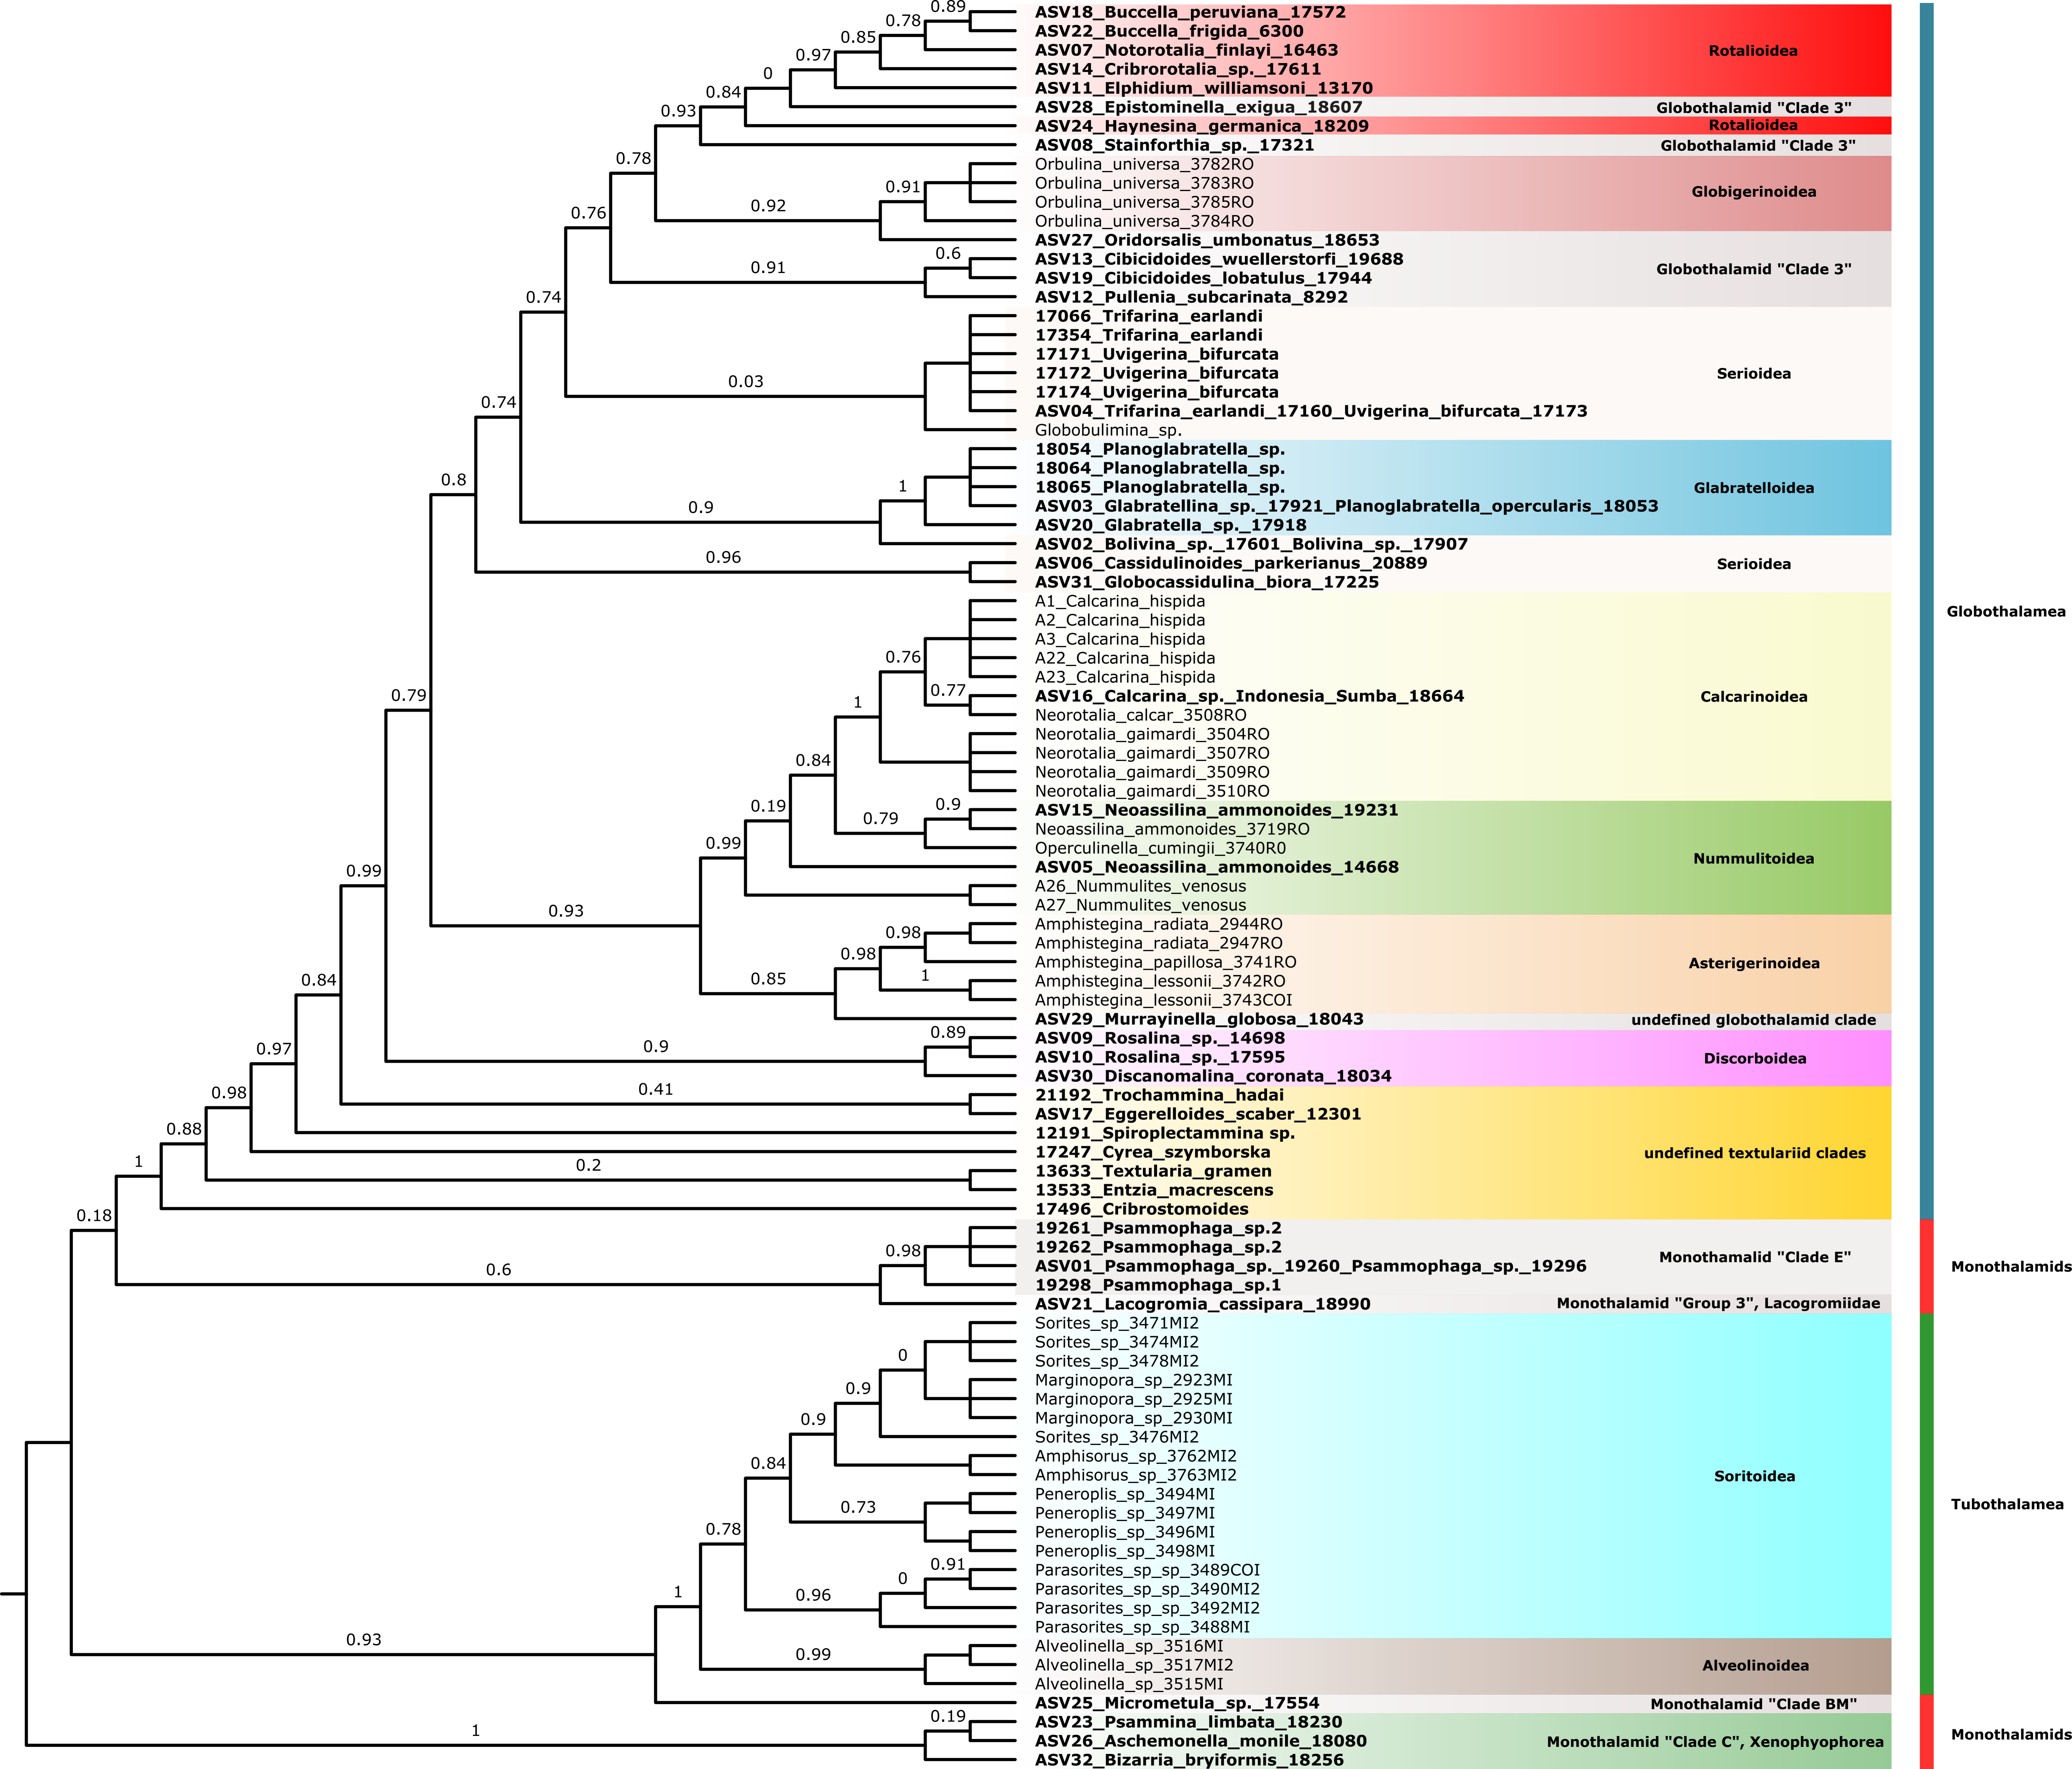

0.08
